# Supplementary material for: The world's richest tadpole communities show functional redundancy and low functional diversity: ecological data on Madagascar's stream-dwelling amphibian larvae
Source: Springer Nature journal article supplement (doi:10.1186/1472-6785-10-12), 2010-01-01

(A1)

Residuals vs Fitted

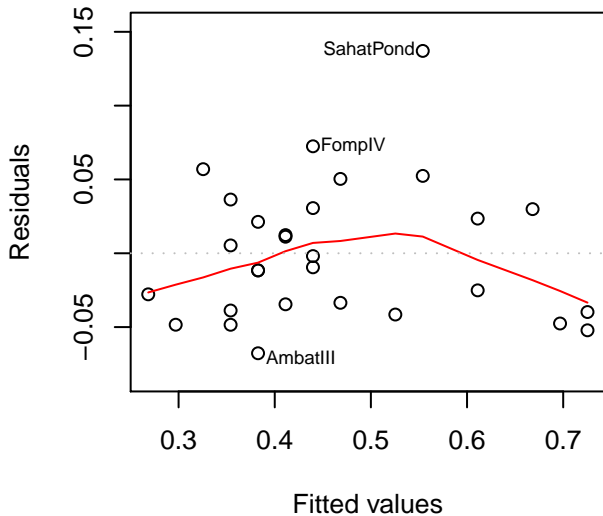

(A2)

Normal Q-Q

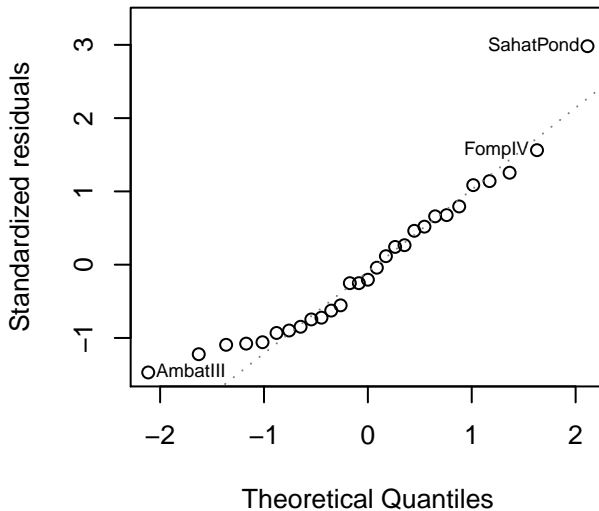

(A3)

Scale-Location

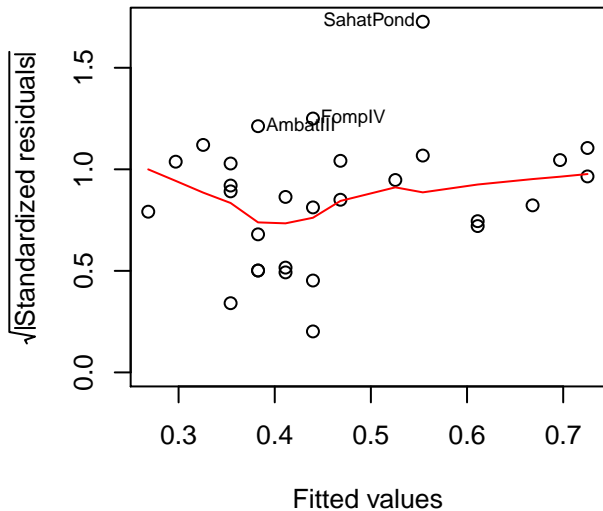

(A4)

Residuals vs Leverage

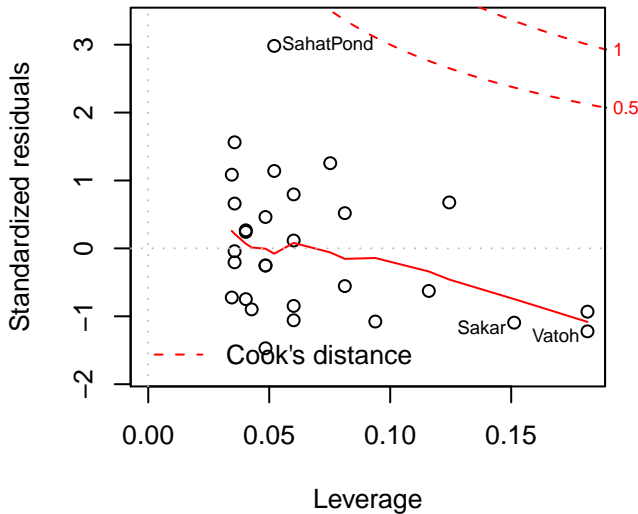

( B1 )

Residuals vs Fitted

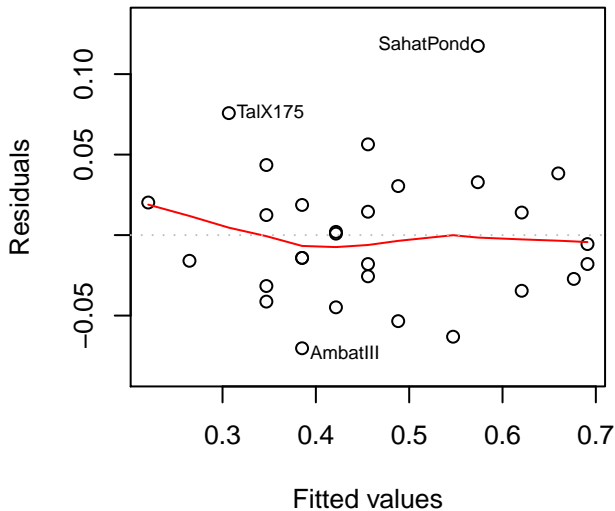

( B2 )

Normal Q-Q

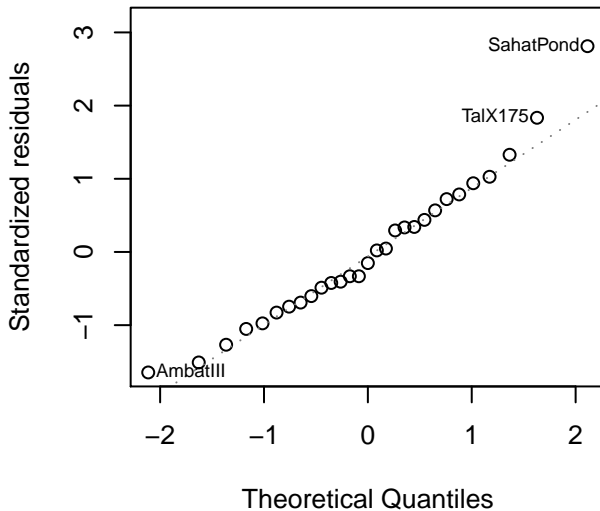

( B3 )

Scale-Location

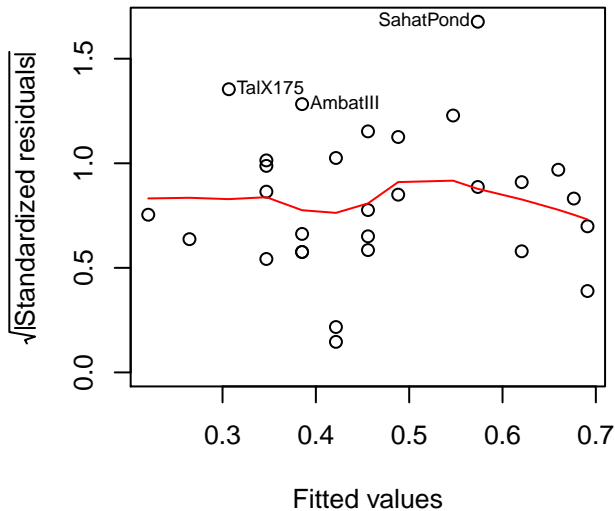

( B4 )

Residuals vs Leverage

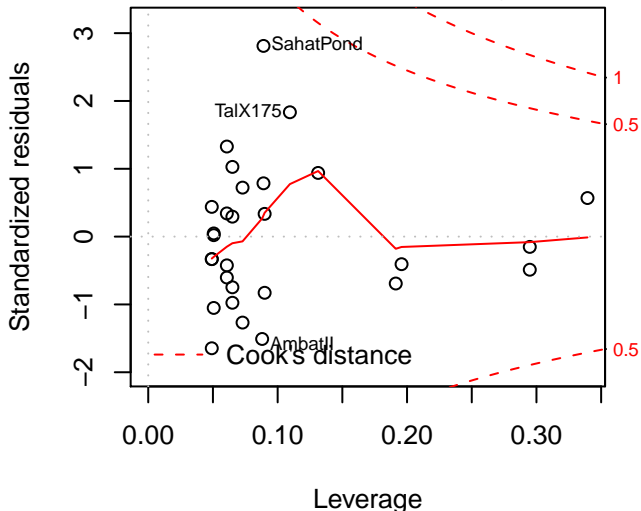

(C1)

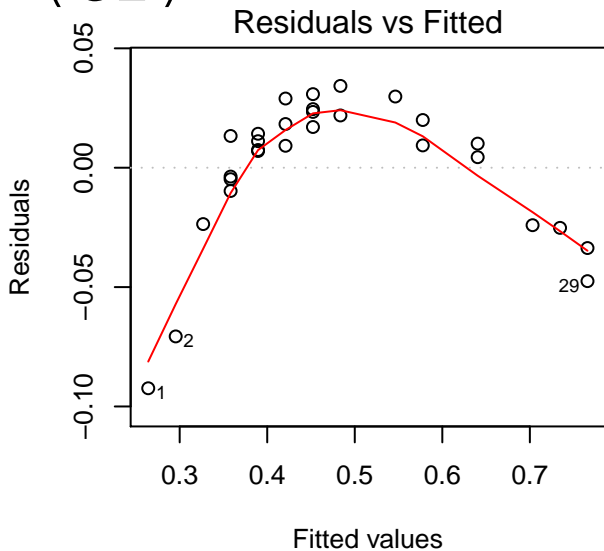

(C2)

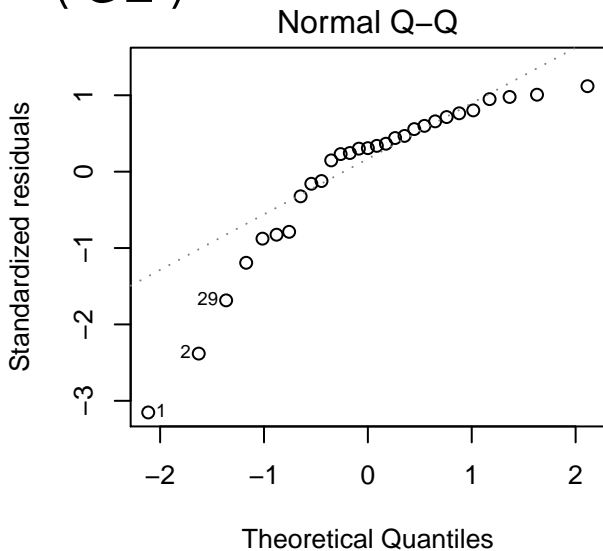

(C3)

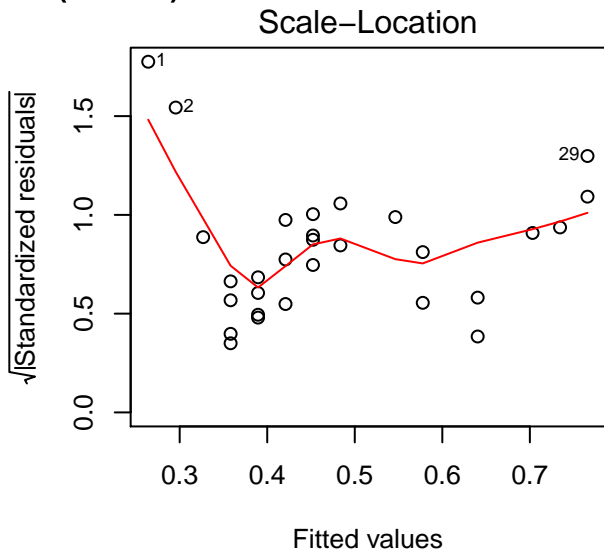

(C4)

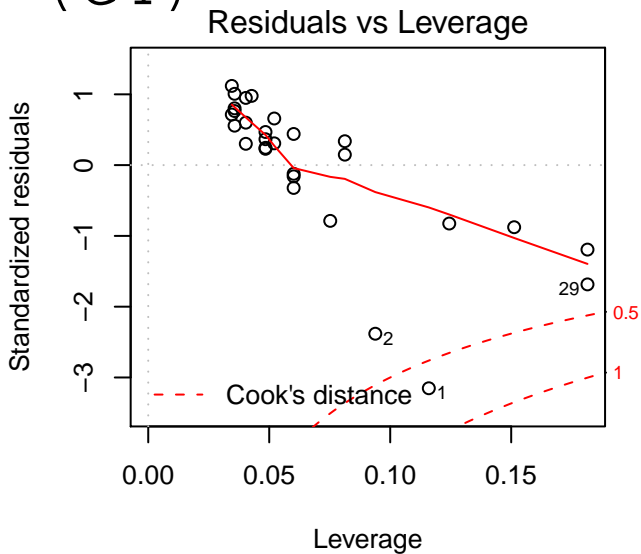

(D1)

Residuals vs Fitted

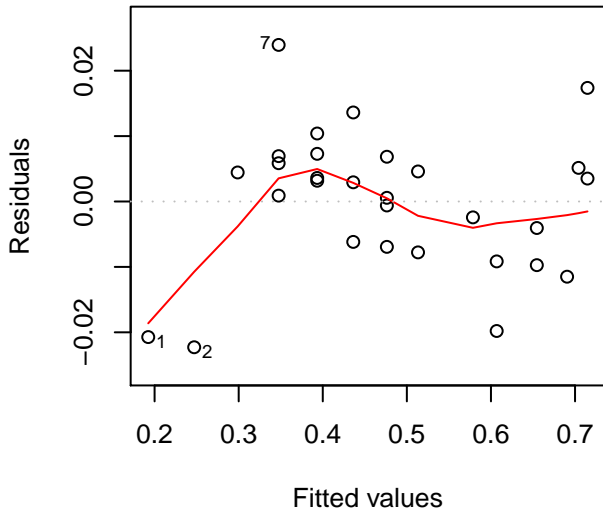

(D2)

Normal Q-Q

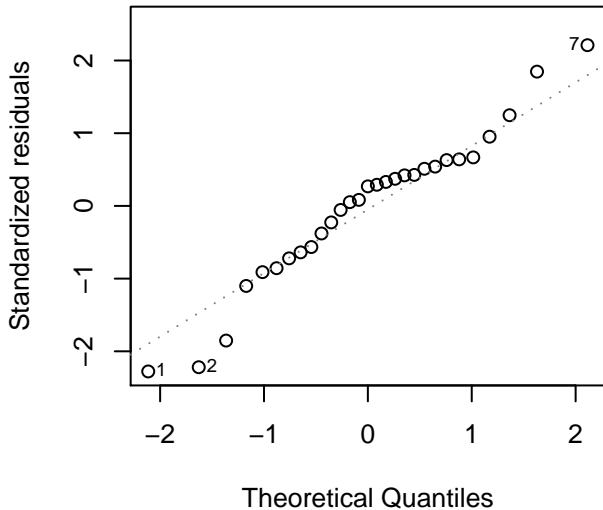

(D3)

Scale-Location

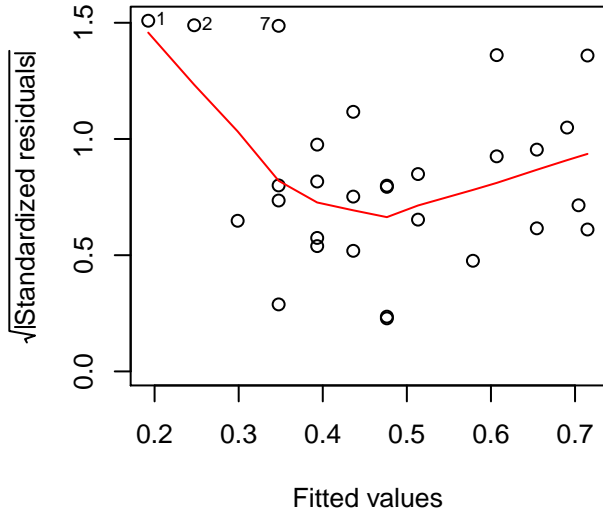

(D4)

Residuals vs Leverage

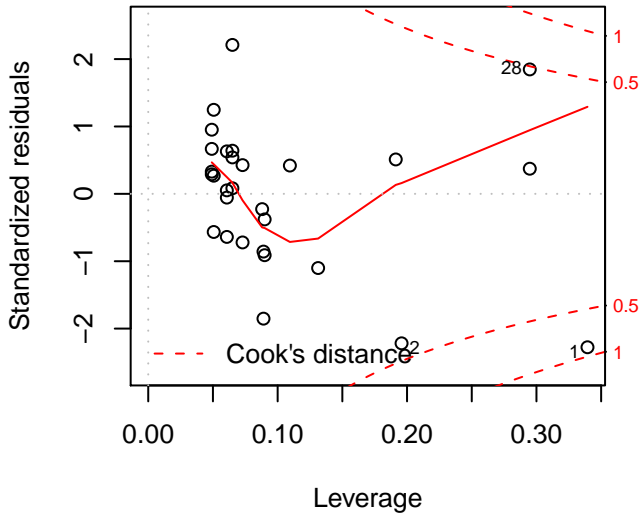

( E )

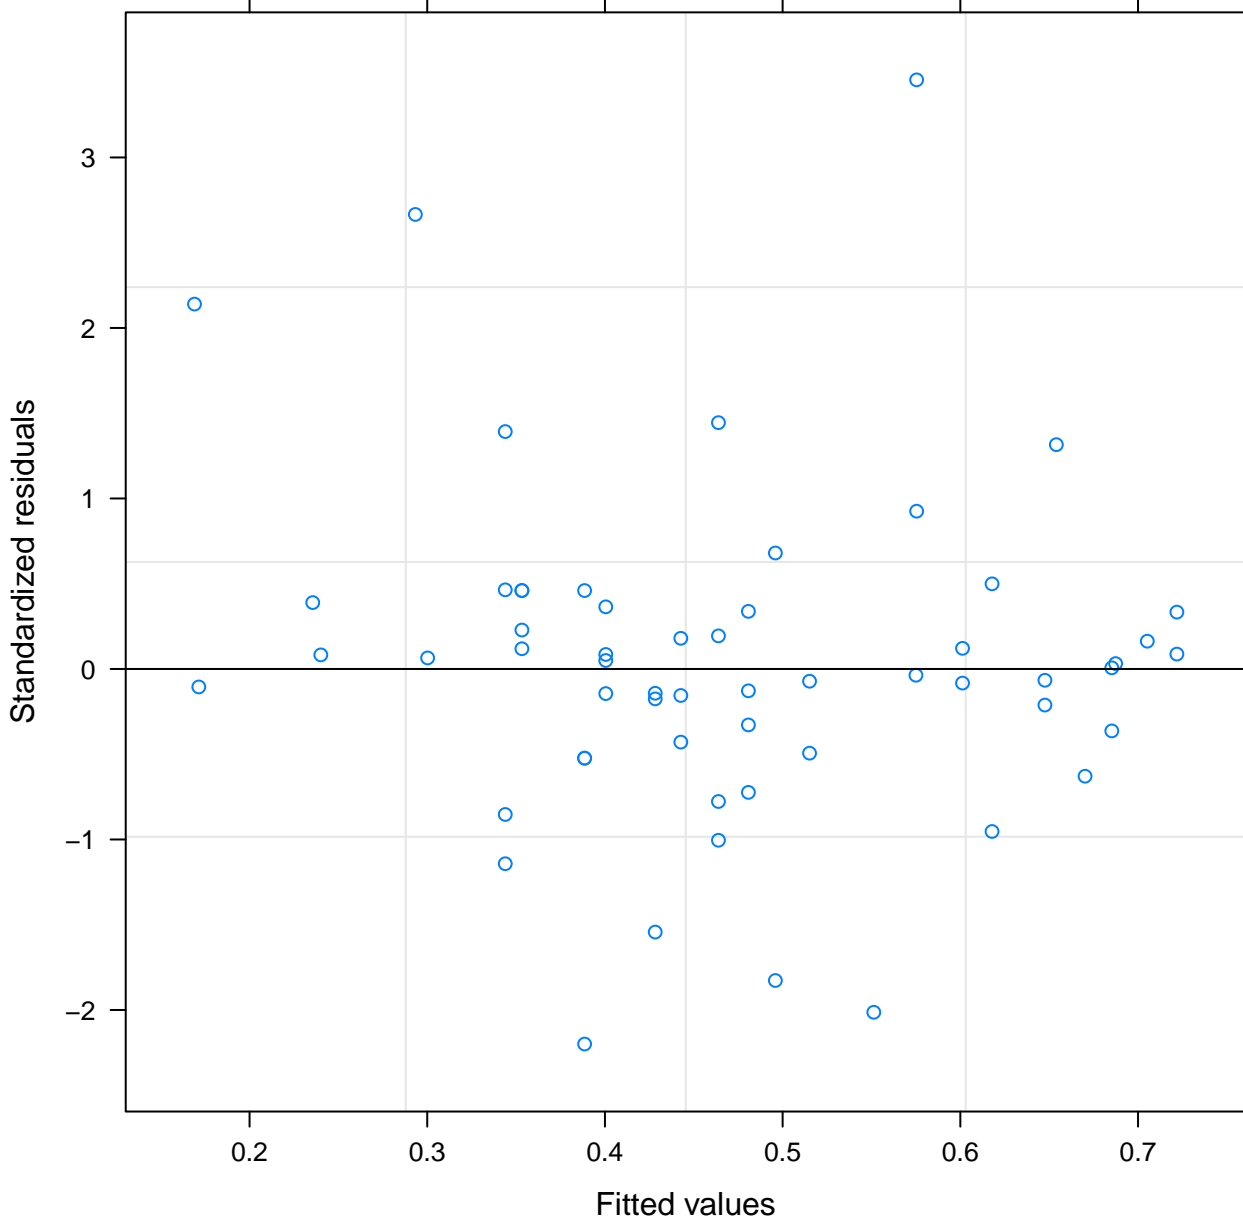

Supplement: Additional file 3 [file 1472-6785-10-12-s3.pdf]
